# Supplementary material for: Field Monitoring of Drosophila suzukii and Associated Communities in South Eastern France as a Pre-Requisite for Classical Biological Control
Source: MDPI journal article supplement (doi:10.3390/insects8040124), 2017-11-16

# Supplementary Materials: Field Monitoring of *Drosophila suzukii* and Associated Communities in South Eastern France as a Pre-Requisite for Classical Biological Control

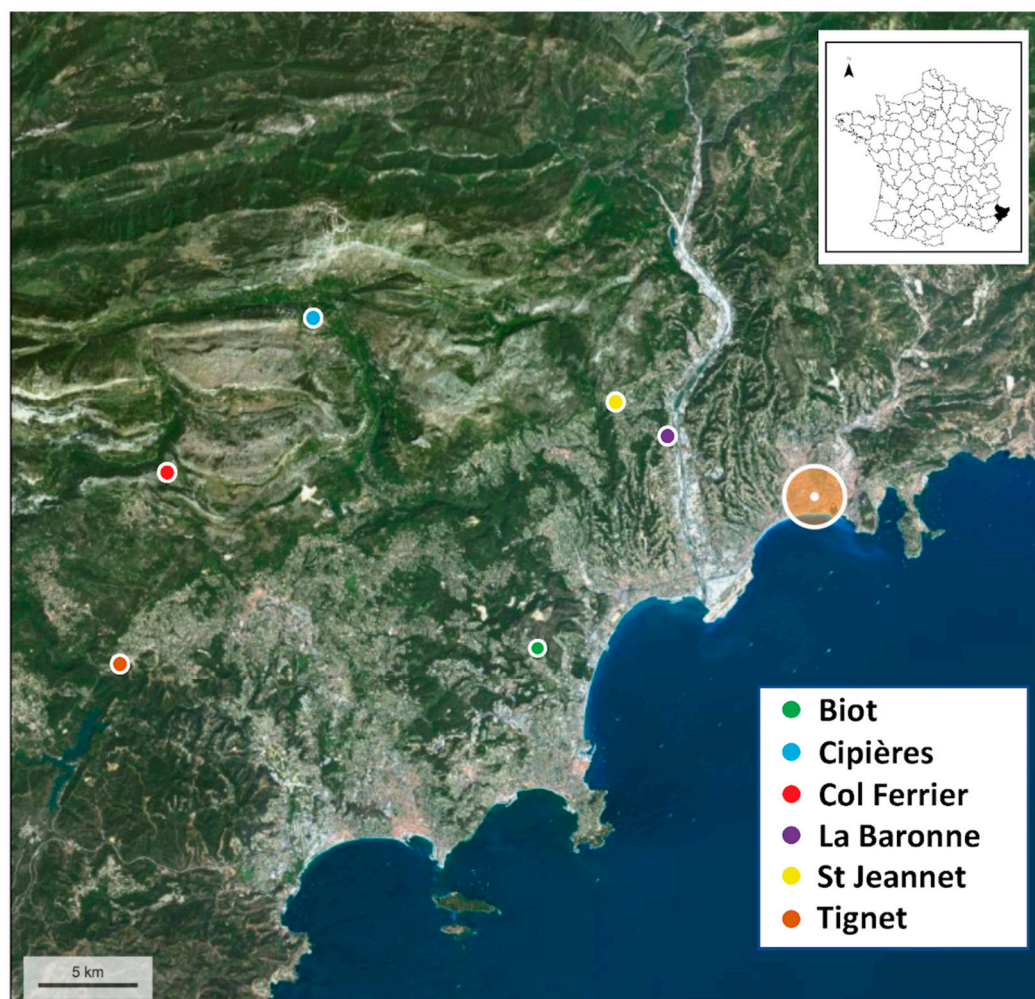

**Figure S1.** Localization of the sampling sites on the satellite map. Sampling sites are indicated by color dots on the satellite picture of the Alpes-Maritimes area (from the geoportal, IGN) visualizing their geographical position (Valley, mountainous backlands and distance to the seaside). The large yellowish dot indicates the town of Nice. The position of the Alpes-Maritimes on the France map is indicated in the insert.

**Table S1.** Climatic data related to the investigated area. These four references were chosen for their vicinity to one or two of the sampled locations (see Table 1). MTmin/MTmea/MTmax respectively indicate the monthly means of daily minimal / mean / maximal temperatures while MRH indicates the monthly Mean Relative humidity. Sampling dates are indicated in the “Session” column.

|                |         | CANNES            |             |       |     | CARROS            |             |       |     | SAINT CEZAIRE     |             |       |     | CAUSSOLS          |             |       |     |
|----------------|---------|-------------------|-------------|-------|-----|-------------------|-------------|-------|-----|-------------------|-------------|-------|-----|-------------------|-------------|-------|-----|
|                |         | 43.555 N; 6.950 E |             |       |     | 43.785 N; 7.208 E |             |       |     | 43.678 N; 6.808 E |             |       |     | 43.752 N; 6.922 E |             |       |     |
| Date           | Session | MTmin             | MTmea       | MTmax | MRH | MTmin             | MTmea       | MTmax | MRH | MTmin             | MTmea       | MTmax | MRH | MTmin             | MTmea       | MTmax | MRH |
| July 2014      |         | 17.3              | 22.3        | 27.3  | 68  | 17.8              | 23.4        | 29.0  | –   | 14.4              | 19.7        | 25.0  | 65  | 12.7              | 16.3        | 19.9  | 72  |
| August 2014    | S1      | 18.0              | 23.3        | 28.7  | 68  | 17.7              | 23.3        | 28.9  | –   | 14.6              | 20.4        | 26.3  | 64  | 12.9              | 16.9        | 20.9  | 67  |
| September 2014 |         | 16.5              | 21.4        | 26.3  | 72  | 16.9              | 22.3        | 27.7  | –   | 13.6              | 18.7        | 23.8  | 68  | 11.4              | 14.7        | 18.1  | 74  |
| October 2014   |         | 13.7              | 18.7        | 23.8  | 75  | 14.0              | 19.0        | 24.0  | –   | 11.0              | 15.6        | 20.2  | 73  | 8.8               | 12.1        | 15.4  | 77  |
| November 2014  | S2      | 10.7              | 14.5        | 18.4  | 81  | 10.3              | 13.9        | 17.5  | –   | 7.9               | 11.1        | 14.4  | 80  | 4.9               | 7.4         | 9.8   | 84  |
| December 2014  |         | 5.8               | 10.6        | 15.3  | 77  | 6.3               | 9.9         | 13.5  | –   | 3.7               | 7.4         | 11.1  | 69  | 1.6               | 4.5         | 7.3   | 65  |
| January 2015   |         | 3.1               | 8.9         | 14.7  | 72  | 3.8               | <u>8.8</u>  | 13.8  | –   | 2.5               | 6.9         | 11.3  | 59  | 0.2               | 3.6         | 7.0   | 59  |
| February 2015  | S3      | 3.8               | <u>8.7</u>  | 13.7  | 73  | 4.2               | 9.0         | 13.7  | –   | 1.5               | <u>5.6</u>  | 9.7   | 67  | -1.3              | <u>1.9</u>  | 5.1   | 69  |
| March 2015     |         | 6.5               | 11.8        | 17.1  | 69  | 7.0               | 12.3        | 17.5  | –   | 5.0               | 9.4         | 13.9  | 61  | 2.5               | 5.6         | 8.7   | 66  |
| April 2015     | S4      | 9.0               | 13.9        | 18.8  | 74  | 9.2               | 14.7        | 20.2  | –   | 7.1               | 12.1        | 17.0  | 67  | 5.2               | 8.7         | 12.1  | 67  |
| May 2015       |         | 13.1              | 18.2        | 23.2  | 70  | 13.3              | 18.8        | 24.2  | –   | 10.9              | 16.1        | 21.3  | 65  | 9.4               | 13.2        | 17.0  | 63  |
| June 2015      | S5      | 17.0              | 22.1        | 27.3  | 68  | 17.6              | 23.4        | 29.2  | –   | 14.6              | 19.9        | 25.2  | 64  | 12.6              | 16.2        | 19.8  | 69  |
| July 2015      |         | 21.0              | <b>26.2</b> | 31.3  | 65  | 21.3              | <b>27.5</b> | 33.7  | –   | 18.6              | <b>24.5</b> | 30.4  | 58  | 17.7              | <b>21.4</b> | 25.1  | 59  |
| August 2015    | S6      | 18.5              | 23.9        | 29.3  | 65  | 19.9              | 25.4        | 31.0  | –   | 16.6              | 22.0        | 27.4  | 59  | 14.4              | 18.0        | 21.6  | 66  |
| September 2015 |         | 15.0              | 20.4        | 25.8  | 64  | 15.6              | 21.1        | 26.6  | –   | 12.4              | 17.5        | 22.6  | 61  | 9.9               | 13.5        | 17.0  | 67  |
| October 2015   | S7      | 11.5              | 16.0        | 20.5  | 79  | 11.9              | 16.5        | 21.1  | –   | 8.6               | 12.8        | 17.0  | 78  | 6.6               | 9.8         | 13.0  | 77  |

**Table S2.** Summary of post hoc tests (Tukey HSD tests) dealing with the temporal abundances of the three most abundant parasitoids. When the comparison between two sampling dates (S1 to S7—see Material and Methods) was possible, we indicate the observed statistics (above) and the related *p*-value (below).

| <i>A—L. boulardi</i>        |                                             |               |                                             |                                             |                                             |                                             |
|-----------------------------|---------------------------------------------|---------------|---------------------------------------------|---------------------------------------------|---------------------------------------------|---------------------------------------------|
|                             | S2                                          | S3            | S4                                          | S5                                          | S6                                          | S7                                          |
|                             | November 2014                               | February 2015 | April 2015                                  | June 2015                                   | August 2015                                 | October 2015                                |
| S1 August 2014              | <b>−4.50</b><br><i>p</i> < 10 <sup>−3</sup> | –             | –                                           | –                                           | <b>−4.09</b><br><i>p</i> < 10 <sup>−3</sup> | <b>−3.46</b><br><i>p</i> = 0.005            |
| S2                          |                                             | –             | –                                           | –                                           | 1.48<br><i>p</i> = 0.67                     | <b>3.18</b><br><i>p</i> = <b>0.01</b>       |
| S3                          |                                             |               | –                                           | –                                           | –                                           | –                                           |
| S4                          |                                             |               |                                             | –                                           | –                                           | –                                           |
| S5                          |                                             |               |                                             |                                             | –                                           | –                                           |
| S6                          |                                             |               |                                             |                                             |                                             | 2.41<br><i>p</i> = 0.12                     |
| <i>B—P. vindemmiae</i>      |                                             |               |                                             |                                             |                                             |                                             |
|                             | S2                                          | S3            | S4                                          | S5                                          | S6                                          | S7                                          |
| S1                          | <b>−4.52</b><br><i>p</i> < 10 <sup>−3</sup> | –             | <b>−4.63</b><br><i>p</i> < 10 <sup>−3</sup> | <b>−4.51</b><br><i>p</i> < 10 <sup>−3</sup> | −4.35<br><i>p</i> < 10 <sup>−3</sup>        | −4.63<br><i>p</i> < 10 <sup>−3</sup>        |
| S2                          |                                             | –             | −0.05<br><i>p</i> = 1                       | 0.37<br><i>p</i> = 1                        | 0.74<br><i>p</i> = 0.99                     | −0.03<br><i>p</i> = 1                       |
| S3                          |                                             |               | –                                           | –                                           | –                                           | –                                           |
| S4                          |                                             |               |                                             | 0.42<br><i>p</i> = 1                        | 0.80<br><i>p</i> = 0.98                     | 0.02<br><i>p</i> = 1                        |
| S5                          |                                             |               |                                             |                                             | 0.38<br><i>p</i> = 1                        | −0.41<br><i>p</i> = 1                       |
| S6                          |                                             |               |                                             |                                             |                                             | −0.78<br><i>p</i> = 0.98                    |
| <i>C—T. cf. drosophilae</i> |                                             |               |                                             |                                             |                                             |                                             |
|                             | S2                                          | S3            | S4                                          | S5                                          | S6                                          | S7                                          |
| S1                          | <b>−4.18</b><br><i>p</i> < 10 <sup>−3</sup> | –             | <b>−4.59</b><br><i>p</i> < 10 <sup>−3</sup> | <b>−4.33</b><br><i>p</i> < 10 <sup>−3</sup> | <b>−4.33</b><br><i>p</i> < 10 <sup>−3</sup> | <b>−4.59</b><br><i>p</i> < 10 <sup>−3</sup> |
| S2                          |                                             | –             | −1.26<br><i>p</i> = 0.84                    | −0.08<br><i>p</i> = 1                       | −0.08<br><i>p</i> = 1                       | −0.83<br><i>p</i> = 0.98                    |
| S3                          |                                             |               | –                                           | –                                           | –                                           | –                                           |
| S4                          |                                             |               |                                             | 1.20<br><i>p</i> = 0.87                     | 1.20<br><i>p</i> = 0.87                     | 0.49<br><i>p</i> = 1.00                     |
| S5                          |                                             |               |                                             |                                             | 0.00<br><i>p</i> = 1                        | −0.76<br><i>p</i> = 0.99                    |
| S6                          |                                             |               |                                             |                                             |                                             | −0.76<br><i>p</i> = 0.99                    |

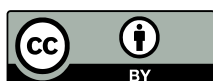

Supplement: s1 [file s1]
